# Supplementary material for: Can macrocyclic phosphonate molecules inhibit barium sulfate crystallization?
Source: Royal Society of Chemistry journal article supplement (doi:10.1039/c8ce01869c), 2018-11-22
Supplement: c8ce01869c1.pdf [file c8ce01869c1.pdf]

**Supplementary information:**

Determination of complexation constants:

Initial concentrations of organic macrocycles were DOTP = 0.0912 mM and NOTP = 0.0973 mM. Complexation was determined at 0.25 mM BaCl<sub>2</sub> concentration. Using the graphs shown in Figure 2 of the main manuscript, the concentration of Ba<sup>2+</sup> complexed was determined by the following procedure:

- a) At 0.25mM Ba<sup>2+</sup> the conductivity values of the DOTP and NOTP system were determined.
- b) This value was used to determine the Ba<sup>2+</sup> conc. in the absence of DOTP or NOTP by using the control linear regression.
- c) 0.25 mM – Ba<sup>2+</sup> conc. determined in b) = conc of Ba<sup>2+</sup> complexed.

For NOTP the complexed [Ba<sup>2+</sup>] = 0.0001 mM

While for DOTP the complexed [Ba<sup>2+</sup>] = 0.0444 mM.

We then assumed

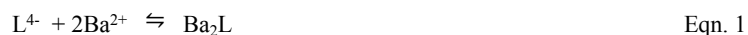

This was decided upon from the speciation information. We then calculated the K value, keeping in mind the stoichiometry of the complexed barium concentration to the complex concentration:

$$K = \frac{[Ba_2L]}{[L^4][Ba^{2+}]^2}$$

and the initial ligand and barium ion concentrations listed above.

Using this method, we determined

|      | K         | log K |
|------|-----------|-------|
| DOTP | 3,860,800 | 6.59  |
| NOTP | 2055.5    | 3.31  |

Speciation with barium present

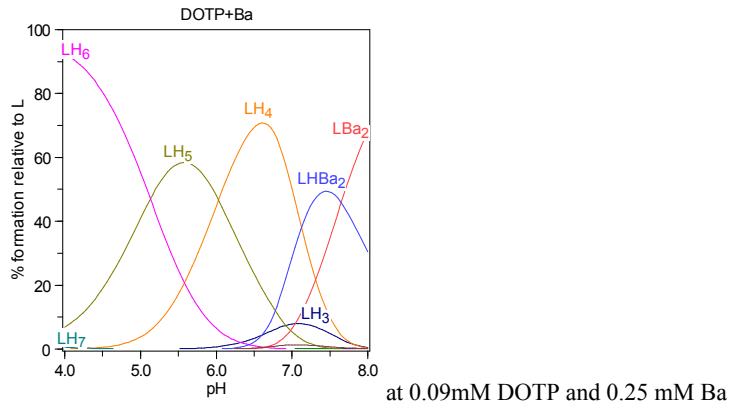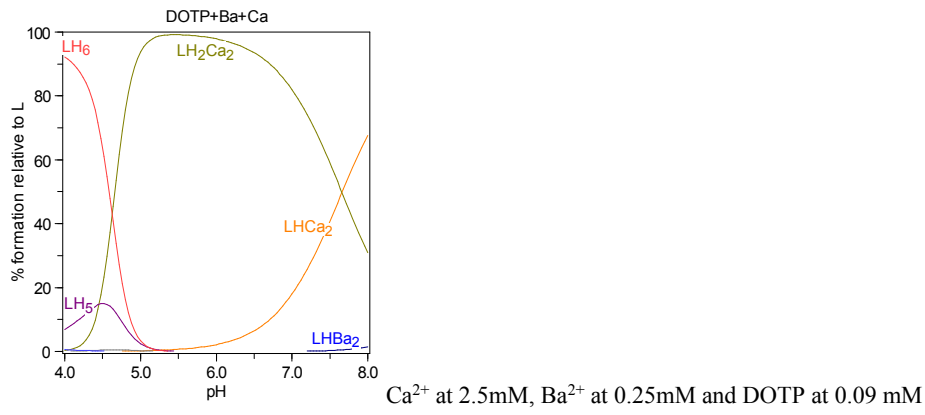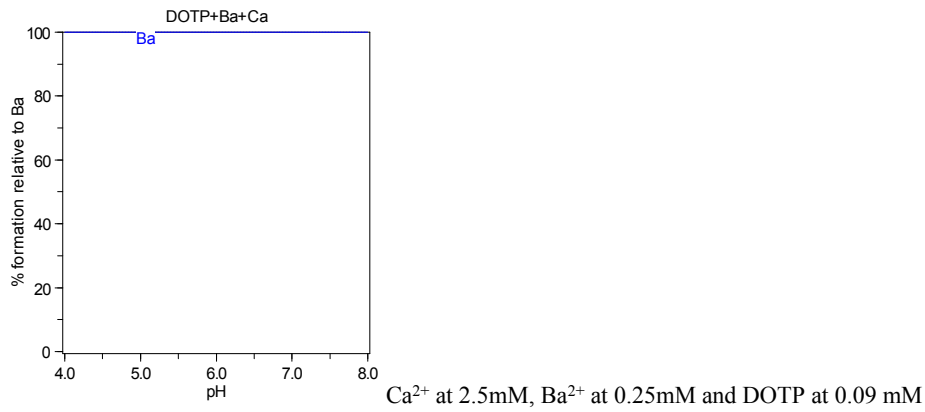

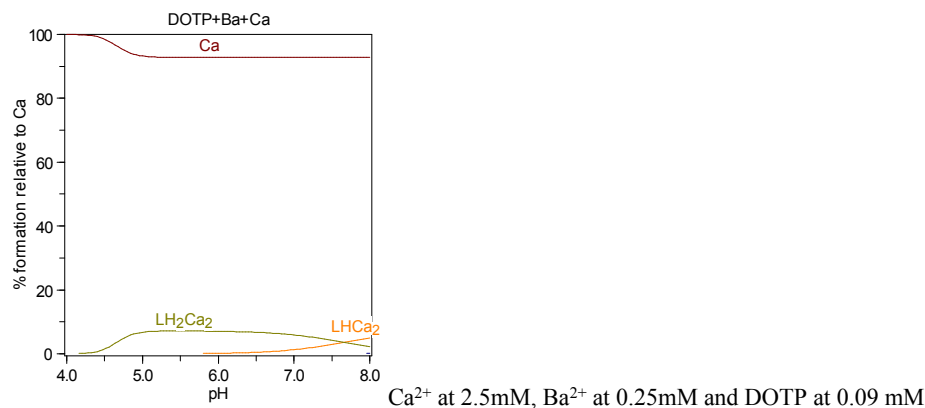

Interatomic potentials for describing the interactions between the organic molecule, DOTP and the barite lattice. C1 refers to that carbon bonded to the phosphorous atom or carboxylate carbon atom, C2 refers to that carbon on the backbone. O3 is the oxygen on the organic molecule while O is on the sulfate.

Lennard-Jones potentials (are 9 6 in form).

|    |         |      |               |           |
|----|---------|------|---------------|-----------|
| C1 | core C1 | core | 77689.066061  | 22.932654 |
| H1 | core C1 | core | 4895.307763   | 5.719317  |
| C1 | core P  | core | 142528.855995 | 46.742924 |
| C1 | core N  | core | 87418.951402  | 34.993722 |
| C1 | core O3 | core | 30331.205624  | 22.281108 |
| C2 | core C2 | core | 77689.066061  | 22.932654 |
| H1 | core C2 | core | 4895.307763   | 5.719317  |
| C2 | core P  | core | 142528.855995 | 46.742924 |
| C2 | core N  | core | 87418.951402  | 34.993722 |
| C2 | core O3 | core | 30331.205624  | 22.281108 |
| C1 | core C2 | core | 77689.066061  | 22.932654 |
| H1 | core O3 | core | 1911.216003   | 5.556824  |
| H1 | core P  | core | 8980.962838   | 11.657507 |
| H1 | core N  | core | 5508.402831   | 8.727301  |
| H1 | core H1 | core | 308.460885    | 1.426376  |
| O3 | core O3 | core | 11841.847009  | 21.648074 |
| O3 | core P  | core | 55645.823251  | 45.414898 |
| N  | core O3 | core | 34129.927477  | 33.999506 |

P core P core 261484.348072 95.274665  
N core P core 160379.365686 71.326627  
N core N core 98367.420946 53.398117

harmonic

C1 core P core 21.618618 1.750000  
O3 core P core 41.657715 1.530000  
H1 core C1 core 29.561139 1.105000  
H1 core C2 core 29.561139 1.105000  
C1 core N core 30.948107 1.470000  
C2 core N core 30.948107 1.470000  
C2 core C2 core 28.007506 1.526000

three-body

C1 core H1 core P core 3.818624 109.500000  
C1 core N core P core 4.339345 109.500000  
P core C1 core O3 core 9.546560 120.000000  
P core O3 core O3 core 9.546560 109.500000  
C1 core H1 core N core 4.972890 109.500000  
C2 core H1 core N core 4.972890 109.500000  
N core C1 core C1 core 7.489710 110.250000  
N core C1 core C2 core 7.489710 110.250000  
C2 core C2 core N core 4.339345 109.500000  
C2 core H1 core C2 core 3.853339 110.000000  
C2 core H1 core H1 core 3.428083 106.400000  
C1 core H1 core H1 core 3.428083 106.400000

four body

P core C1 core N core C1 core 0.005784 1 3

|    |         |         |         |      |          |   |   |
|----|---------|---------|---------|------|----------|---|---|
| P  | core C1 | core N  | core C2 | core | 0.005784 | 1 | 3 |
| C1 | core N  | core C1 | core H1 | core | 0.005784 | 1 | 3 |
| C1 | core N  | core C2 | core H1 | core | 0.005784 | 1 | 3 |
| C2 | core N  | core C1 | core H1 | core | 0.005784 | 1 | 3 |
| N  | core C2 | core C2 | core H1 | core | 0.006861 | 1 | 3 |
| N  | core C2 | core C2 | core N  | core | 0.006861 | 1 | 3 |
| H1 | core C2 | core C2 | core H1 | core | 0.006861 | 1 | 3 |
| C2 | core C2 | core N  | core C1 | core | 0.005784 | 1 | 3 |

charges

|    |           |
|----|-----------|
| O3 | -1.19000  |
| P  | 2.110000  |
| C1 | -0.595000 |
| N  | -0.465000 |
| C2 | 0.080000  |
| H1 | 0.060000  |

organic-barium sulfate potentials

nine-six intermolecular

|    |         |      |           |          |       |        |
|----|---------|------|-----------|----------|-------|--------|
| O3 | core Ba | core | 1420.000  | 53.90000 | 0.000 | 15.000 |
| P  | core Ba | core | 7210.000  | 173.0000 | 0.000 | 15.000 |
| C2 | core Ba | core | 2010.0000 | 64.7000  | 0.000 | 15.000 |
| N  | core Ba | core | 1750.0000 | 62.4000  | 0.000 | 15.000 |
| C1 | core Ba | core | 2110.0000 | 66.5000  | 0.000 | 15.000 |
| H1 | core Ba | core | 301.0000  | 16.6000  | 0.000 | 15.000 |
| H2 | core Ba | core | 301.0000  | 16.6000  | 0.000 | 15.000 |
| O3 | core S  | core | 2740.0000 | 62.2000  | 0.000 | 15.000 |
| P  | core S  | core | 1190.0000 | 199.0000 | 0.000 | 15.000 |
| C2 | core S  | core | 3650.0000 | 74.6000  | 0.000 | 15.000 |
| N  | core S  | core | 3300.0000 | 71.9000  | 0.000 | 15.000 |

|    |        |      |           |         |       |        |
|----|--------|------|-----------|---------|-------|--------|
| C1 | core S | core | 3800.0000 | 76.6000 | 0.000 | 15.000 |
| H1 | core S | core | 688.0000  | 19.1000 | 0.000 | 15.000 |
| H2 | core S | core | 688.0000  | 19.1000 | 0.000 | 15.000 |
| O3 | core O | core | 673.0000  | 19.8000 | 0.000 | 15.000 |
| P  | core O | core | 3140.0000 | 63.4000 | 0.000 | 15.000 |
| C2 | core O | core | 921.0000  | 23.7000 | 0.000 | 15.000 |
| N  | core O | core | 819.0000  | 22.9000 | 0.000 | 15.000 |
| C1 | core O | core | 962.0000  | 24.4000 | 0.000 | 15.000 |
| H1 | core O | core | 158.0000  | 6.09000 | 0.000 | 15.000 |
| H2 | core O | core | 158.0000  | 6.09000 | 0.000 | 15.000 |

Solvation energies:

|                | Solvation energy (in kJmol <sup>-1</sup> ) |
|----------------|--------------------------------------------|
| DOTP           | -7489.1                                    |
| DOTP complexed | -6791.4                                    |
| EDTP           | -7896.8                                    |
| NTMP           | -5472.2 (c/f -5770.6 from ref 27)          |

Initial energies:

|                | (in kJmol <sup>-1</sup> ) |
|----------------|---------------------------|
| DOTP           | 4890.6                    |
| DOTP complexed | -15.847                   |
| EDTP           | 5038.1                    |
| NTMP           | 2739.2                    |
